# Supplementary material for: Evaluation of N-arylhydrazone derivatives of orotic acid as stimulators of human mesenchymal stem cell (hMSCs) differentiation.
Source: Preprints.org preprint supplement (doi:10.20944/preprints201807.0264.v1), 2018-07-16

# checkCIF/PLATON report

Structure factors have been supplied for datablock(s) oh32r

THIS REPORT IS FOR GUIDANCE ONLY. IF USED AS PART OF A REVIEW PROCEDURE FOR PUBLICATION, IT SHOULD NOT REPLACE THE EXPERTISE OF AN EXPERIENCED CRYSTALLOGRAPHIC REFEREE.

No syntax errors found.      CIF dictionary      Interpreting this report

## Datablock: oh32r

---

|                 |                                                 |                    |
|-----------------|-------------------------------------------------|--------------------|
| Bond precision: | C-C = 0.0030 A                                  | Wavelength=0.71073 |
| Cell:           | a=7.9187(5)      b=21.2234(13)      c=5.0207(3) |                    |
|                 | alpha=90      beta=105.7360(19)      gamma=90   |                    |
| Temperature:    | 100 K                                           |                    |
|                 | Calculated                                      | Reported           |
| Volume          | 812.16(9)                                       | 812.16(9)          |
| Space group     | P 21/c                                          | ?                  |
| Hall group      | -P 2ybc                                         | ?                  |
| Moiety formula  | C5 H6 N4 O3, 2(H2 O)                            | ?                  |
| Sum formula     | C5 H10 N4 O5                                    | C10 H20 N8 O10     |
| Mr              | 206.17                                          | 412.34             |
| Dx,g cm-3       | 1.686                                           | 1.686              |
| Z               | 4                                               | 2                  |
| Mu (mm-1)       | 0.150                                           | 0.150              |
| F000            | 432.0                                           | 432.0              |
| F000'           | 432.26                                          |                    |
| h,k,lmax        | 9,25,5                                          | 9,25,5             |
| Nref            | 1424                                            | 1422               |
| Tmin,Tmax       | 0.991,0.997                                     | 0.929,0.997        |
| Tmin'           | 0.928                                           |                    |

Correction method= # Reported T Limits: Tmin=0.929 Tmax=0.997  
AbsCorr = ?

Data completeness= 0.999      Theta(max)= 25.020

R(reflections)= 0.0423( 1039)      wR2(reflections)= 0.0995( 1422)

S = 1.020      Npar= 145

---

The following ALERTS were generated. Each ALERT has the format

**test-name\_ALERT\_alert-type\_alert-level.**

Click on the hyperlinks for more details of the test.

---

## Alert level A

SYMM001\_ALERT\_1\_A \_symmetry\_cell\_setting is missing  
The cell setting should be one of the following  
\* triclinic  
\* monoclinic  
\* orthorhombic  
\* tetragonal  
\* rhombohedral  
\* trigonal  
\* hexagonal  
\* cubic  
The following tests will not be performed.  
SYMMS\_01, SYMMS\_02  
EXPT005\_ALERT\_1\_A \_exptl\_crystal\_description is missing  
Crystal habit description.  
The following tests will not be performed.  
CRYSR\_01

DIFF003\_ALERT\_1\_A \_diffrn\_measurement\_device\_type is missing  
Diffractometer make and type. Replaces \_diffrn\_measurement\_type.  
PLAT122\_ALERT\_1\_A No \_symmetry\_space\_group\_name\_H-M Given ..... Please Do !  
PLAT183\_ALERT\_1\_A Missing \_cell\_measurement\_reflns\_used value .... Please Do !  
PLAT184\_ALERT\_1\_A Missing \_cell\_measurement\_theta\_min value ..... Please Do !  
PLAT185\_ALERT\_1\_A Missing \_cell\_measurement\_theta\_max value ..... Please Do !

---

## Alert level C

RINTA01\_ALERT\_3\_C The value of Rint is greater than 0.12  
Rint given 0.125  
PLAT052\_ALERT\_1\_C Info on Absorption Correction Method Not Given Please Do !  
PLAT088\_ALERT\_3\_C Poor Data / Parameter Ratio ..... 9.81 Note  
PLAT906\_ALERT\_3\_C Large K value in the Analysis of Variance ..... 3.110 Check

---

## Alert level G

PLAT005\_ALERT\_5\_G No Embedded Refinement Details found in the CIF Please Do !  
PLAT007\_ALERT\_5\_G Number of Unrefined Donor-H Atoms ..... 3 Report  
PLAT020\_ALERT\_3\_G The value of Rint is greater than 0.12 ..... 0.125 Report  
PLAT045\_ALERT\_1\_G Calculated and Reported Z Differ by a Factor ... 2.00 Check  
PLAT066\_ALERT\_1\_G Predicted and Reported Tmin&Tmax Range Identical ? Check  
PLAT104\_ALERT\_1\_G The Reported Crystal System is Inconsistent with P21/c Check  
PLAT899\_ALERT\_4\_G SHELXL97 is Deprecated and Succeeded by SHELXL 2014 Note  
PLAT909\_ALERT\_3\_G Percentage of Observed Data at Theta(Max) Still 61 %  
PLAT910\_ALERT\_3\_G Missing # of FCF Reflection(s) Below Theta(Min) 2 Note  
PLAT978\_ALERT\_2\_G Number C-C Bonds with Positive Residual Density 2 Note

- 
- 7 **ALERT level A** = Most likely a serious problem - resolve or explain  
0 **ALERT level B** = A potentially serious problem, consider carefully  
4 **ALERT level C** = Check. Ensure it is not caused by an omission or oversight  
10 **ALERT level G** = General information/check it is not something unexpected
- 11 ALERT type 1 CIF construction/syntax error, inconsistent or missing data  
1 ALERT type 2 Indicator that the structure model may be wrong or deficient  
6 ALERT type 3 Indicator that the structure quality may be low  
1 ALERT type 4 Improvement, methodology, query or suggestion  
2 ALERT type 5 Informative message, check
-

It is advisable to attempt to resolve as many as possible of the alerts in all categories. Often the minor alerts point to easily fixed oversights, errors and omissions in your CIF or refinement strategy, so attention to these fine details can be worthwhile. In order to resolve some of the more serious problems it may be necessary to carry out additional measurements or structure refinements. However, the purpose of your study may justify the reported deviations and the more serious of these should normally be commented upon in the discussion or experimental section of a paper or in the "special\_details" fields of the CIF. checkCIF was carefully designed to identify outliers and unusual parameters, but every test has its limitations and alerts that are not important in a particular case may appear. Conversely, the absence of alerts does not guarantee there are no aspects of the results needing attention. It is up to the individual to critically assess their own results and, if necessary, seek expert advice.

### **Publication of your CIF in IUCr journals**

A basic structural check has been run on your CIF. These basic checks will be run on all CIFs submitted for publication in IUCr journals (*Acta Crystallographica*, *Journal of Applied Crystallography*, *Journal of Synchrotron Radiation*); however, if you intend to submit to *Acta Crystallographica Section C* or *E* or *IUCrData*, you should make sure that full publication checks are run on the final version of your CIF prior to submission.

### **Publication of your CIF in other journals**

Please refer to the *Notes for Authors* of the relevant journal for any special instructions relating to CIF submission.

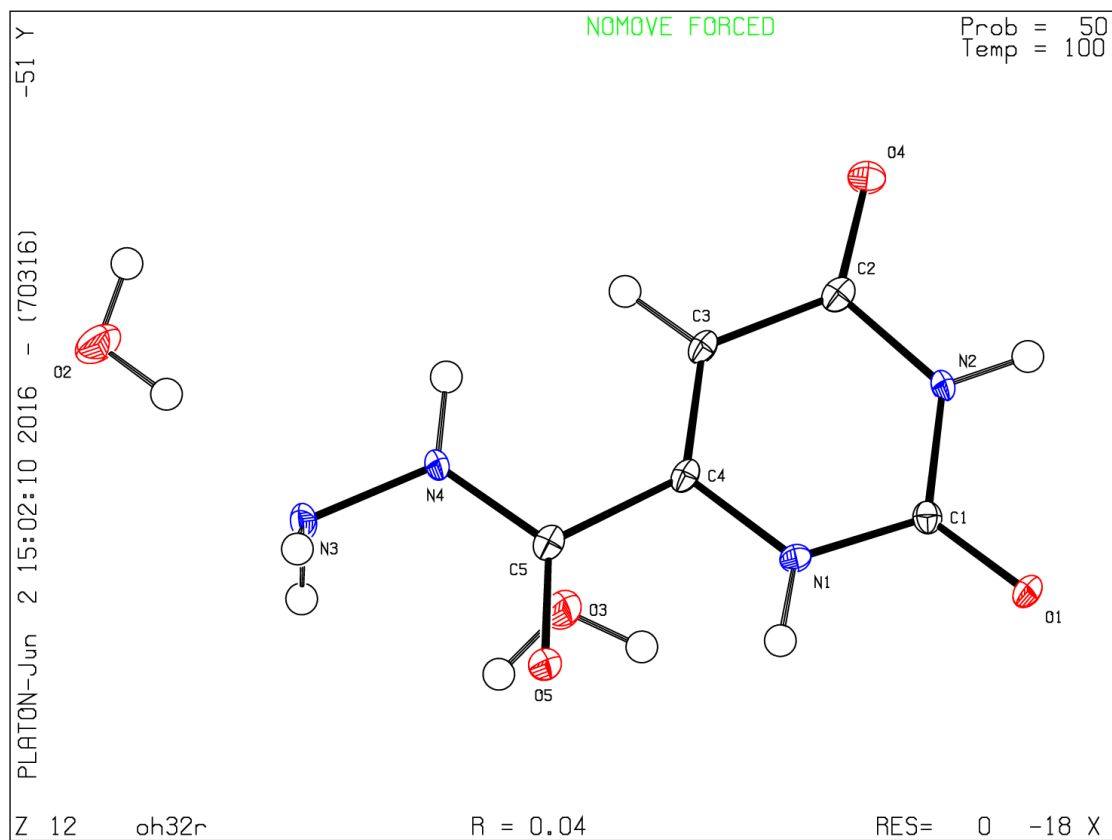

Supplement: Supplementary file 5 [file checkcifOHy.pdf]
