# Supplementary material for: Evaluation of N-arylhydrazone derivatives of orotic acid as stimulators of human mesenchymal stem cell (hMSCs) differentiation.
Source: Preprints.org preprint supplement (doi:10.20944/preprints201807.0264.v1), 2018-07-16

[ Mass Spectrum ]  
 Date : KSU-DI-EI-R5k-ABOH37001 Date : 25-Feb-2014 08:18  
 Sample: -  
 Note : -  
 Inlet : Direct Ion Mode : EI+  
 Spectrum Type : Normal Ion [MF-Linear]  
 RT : 3.92 min Scan# : 87  
 BP : m/z 67.9825 Int. : 15.81  
 Output m/z range : 50.0000 to 281.8647 Cut Level : 0.20 %

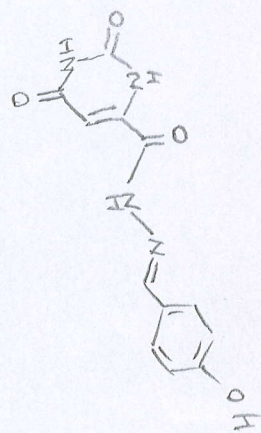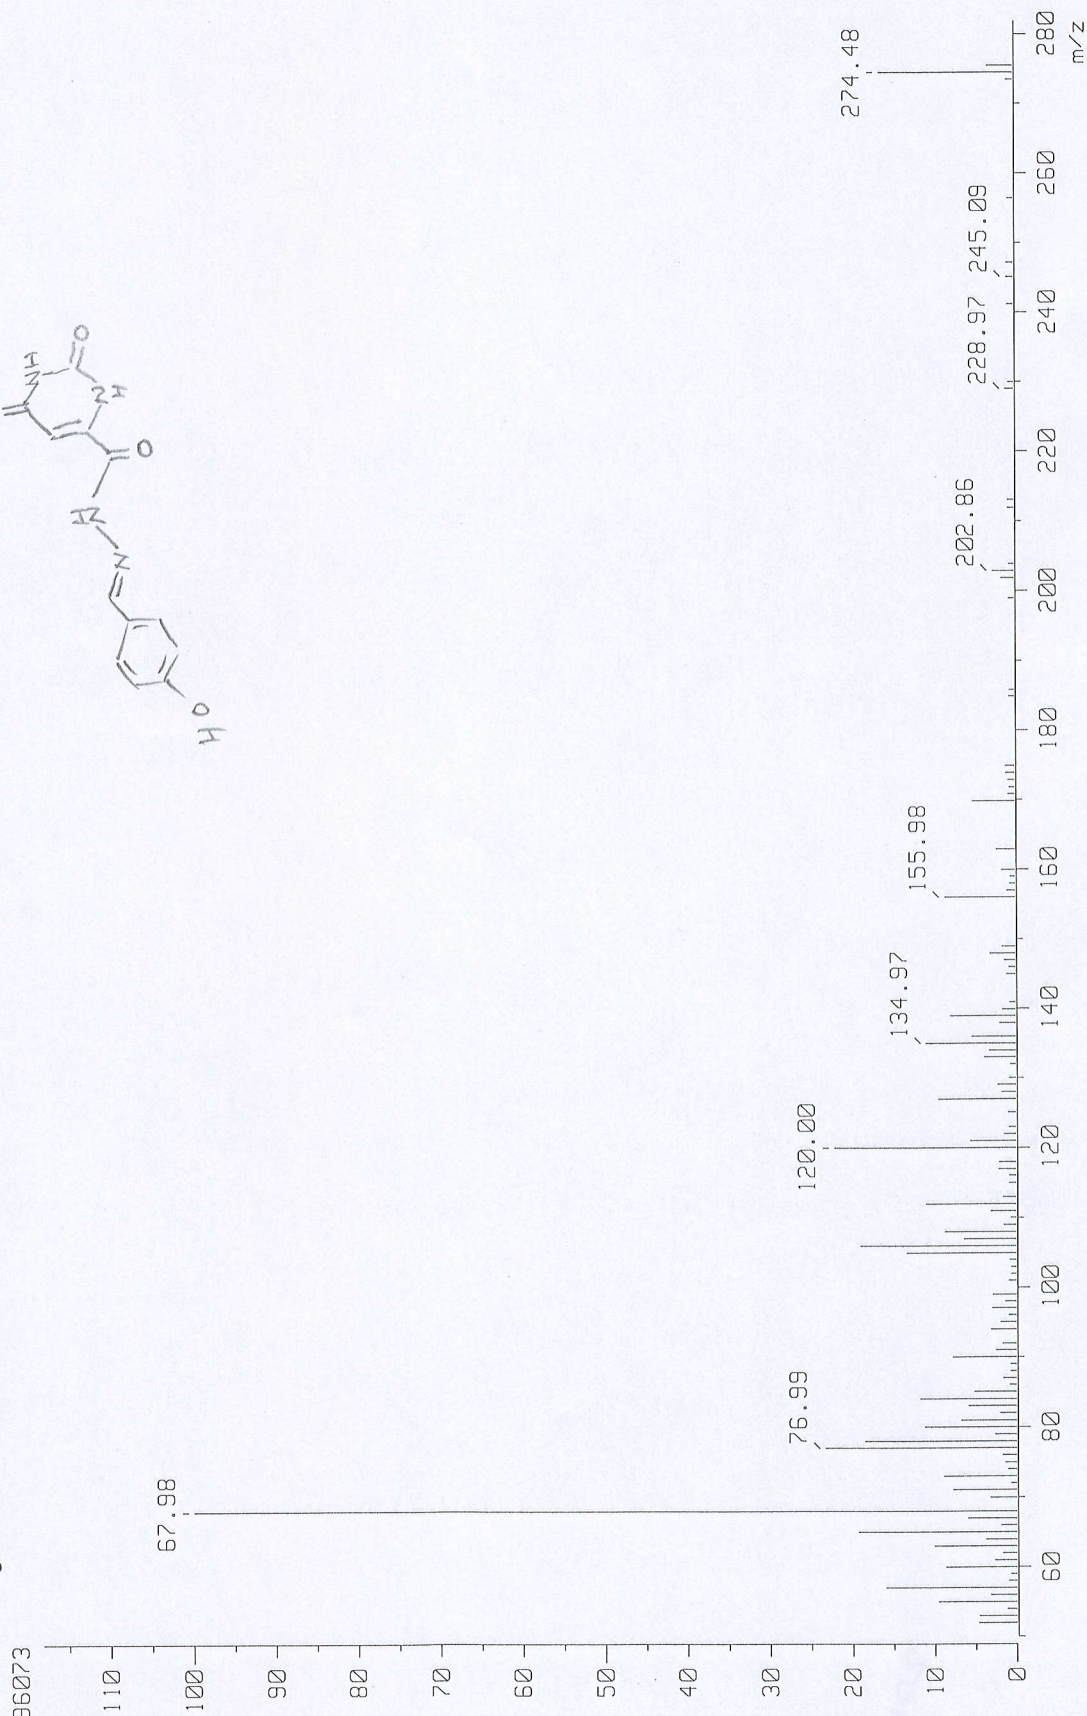



[ Mass Spectrum ]

Data : KSJ-DI-EI-R5k-AB-OH39001 Date : 04-Mar-2014 11:36

Sample: -

Note : -

Inlet : Direct

Ion Mode : EI+

Spectrum Type : Normal Ion [MF-Linear]

RT : 3.24 min Scan# : (68,76)

BP : m/z 68.0116 Int. : 341.43

Output m/z range : 50.0000 to 319.7329 Cut Level : 0.30 %

3875631

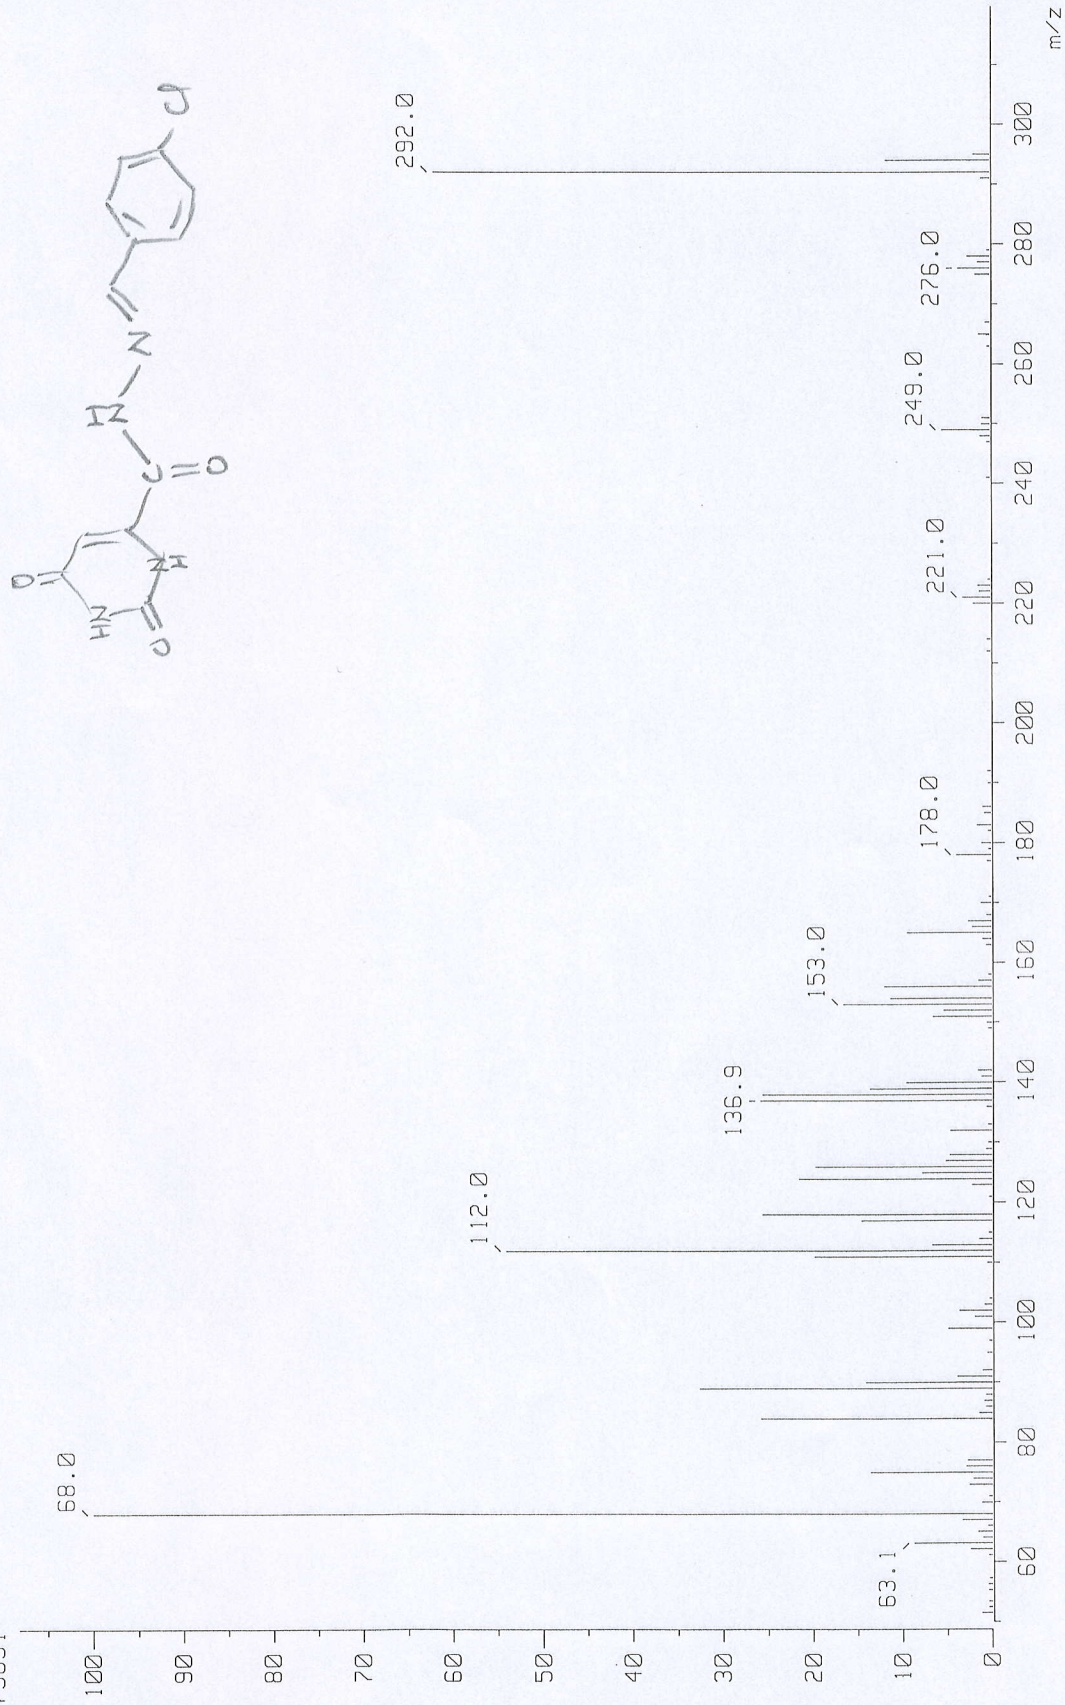



[ Mass Spectrum ]

Data : KSU-DI-EI-R5k-AB-OROTIC-BE00 Date : 01-Jan-2014 09:11

Sample: -

Note : -

Inlet : Direct Ion Mode : EI+

Spectrum Type : Normal Ion [MF-Linear]

RT : 1.35 min Scan# : 27

BP : m/z 67.9823 Int. : 376.45

Output m/z range : 50.0000 to 231.9733

Cut Level : 0.30 %

4829178

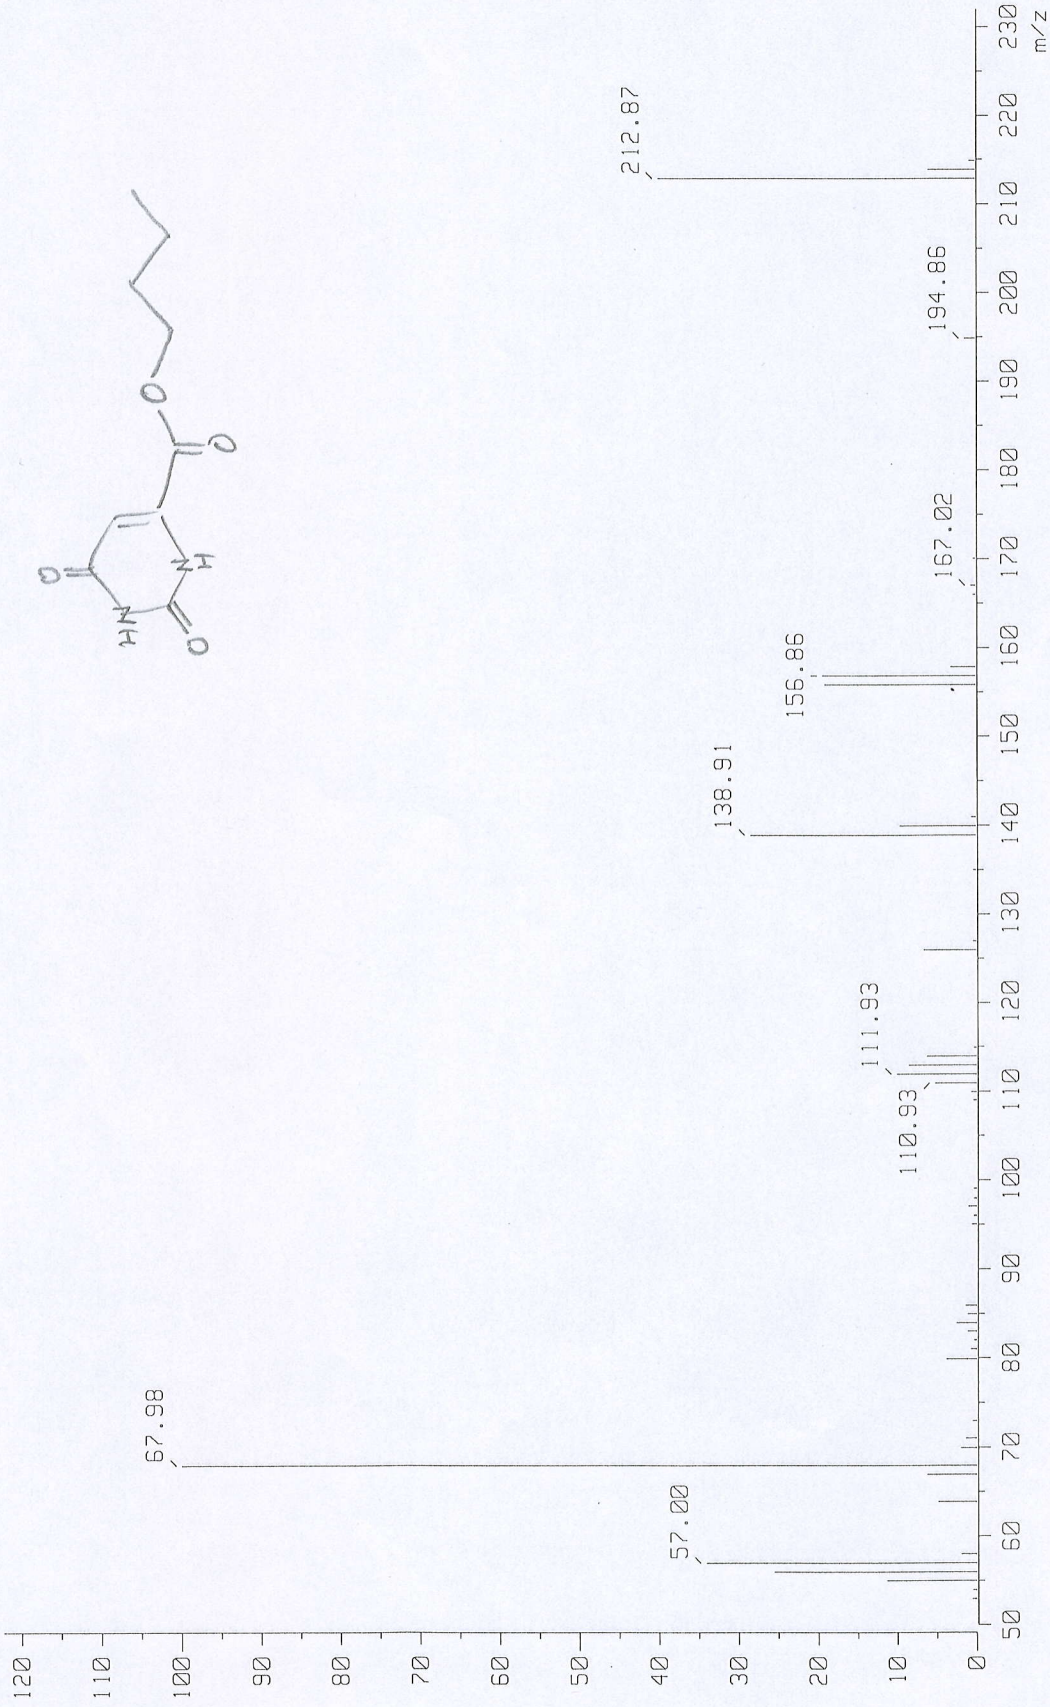



[ Mass Spectrum ]

Data : KSJ-DI-EI-R5k-AB\_OH001 Date : 12-Feb-2015 10:17

Sample: -

Note : -

Inlet : Direct Ion Mode : EI+

Spectrum Type : Normal Ion [MF-Linear]

RT : 1.82 min Scan# : 41

BP : m/z 63.9212 Int. : 304.30

Output m/z range : 50.0000 to 178.5584 Cut Level : 0.10 %

3806460

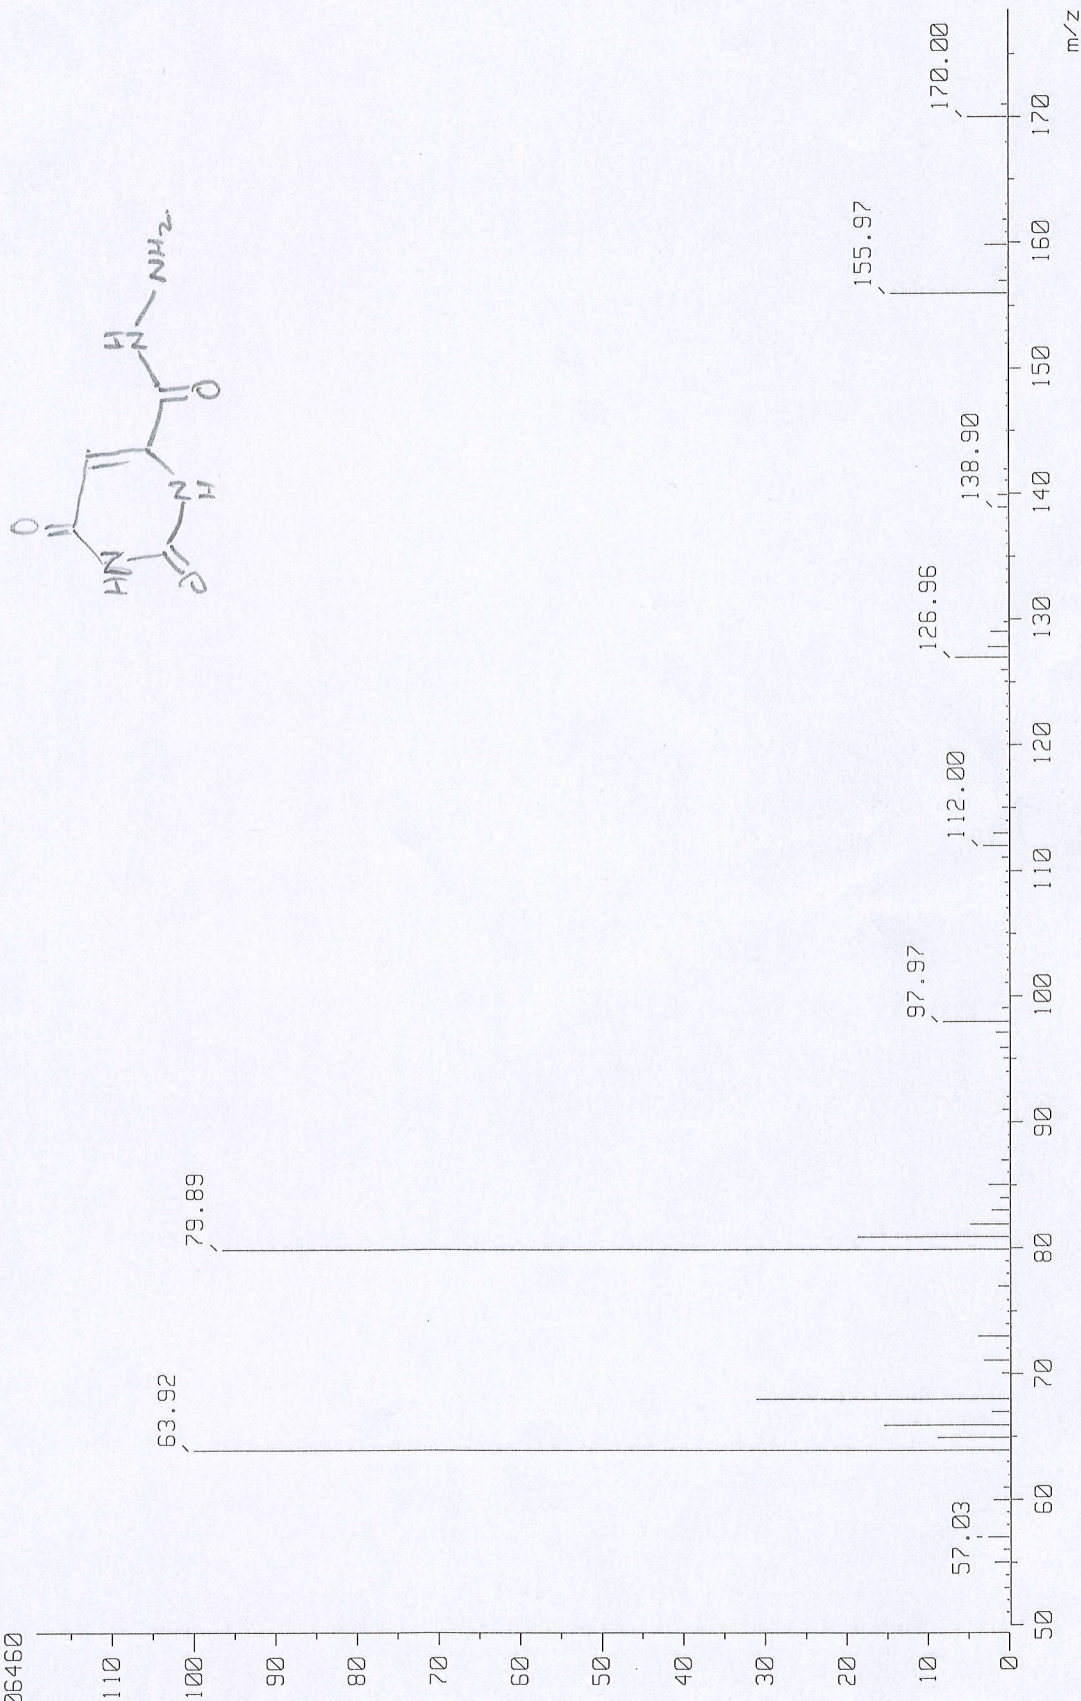



[ Mass Spectrum ]

Data : KSU-DI-EI-R5k-AB0H-35001 Date : 05-Feb-2014 07:54

Sample : -

Note : -

Inlet : Direct Ion Mode : EI+

Spectrum Type : Normal Ion [MF-Linear]

RT : 0.48 min Scan# : (9,14)

BP : m/z 273.9286 Int. : 262.86

Output m/z range : 50.0000 to 324.4055

3023932

Cut Level : 0.80 %

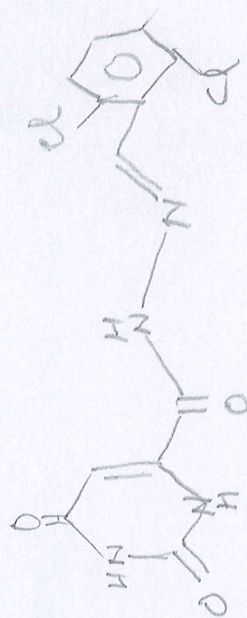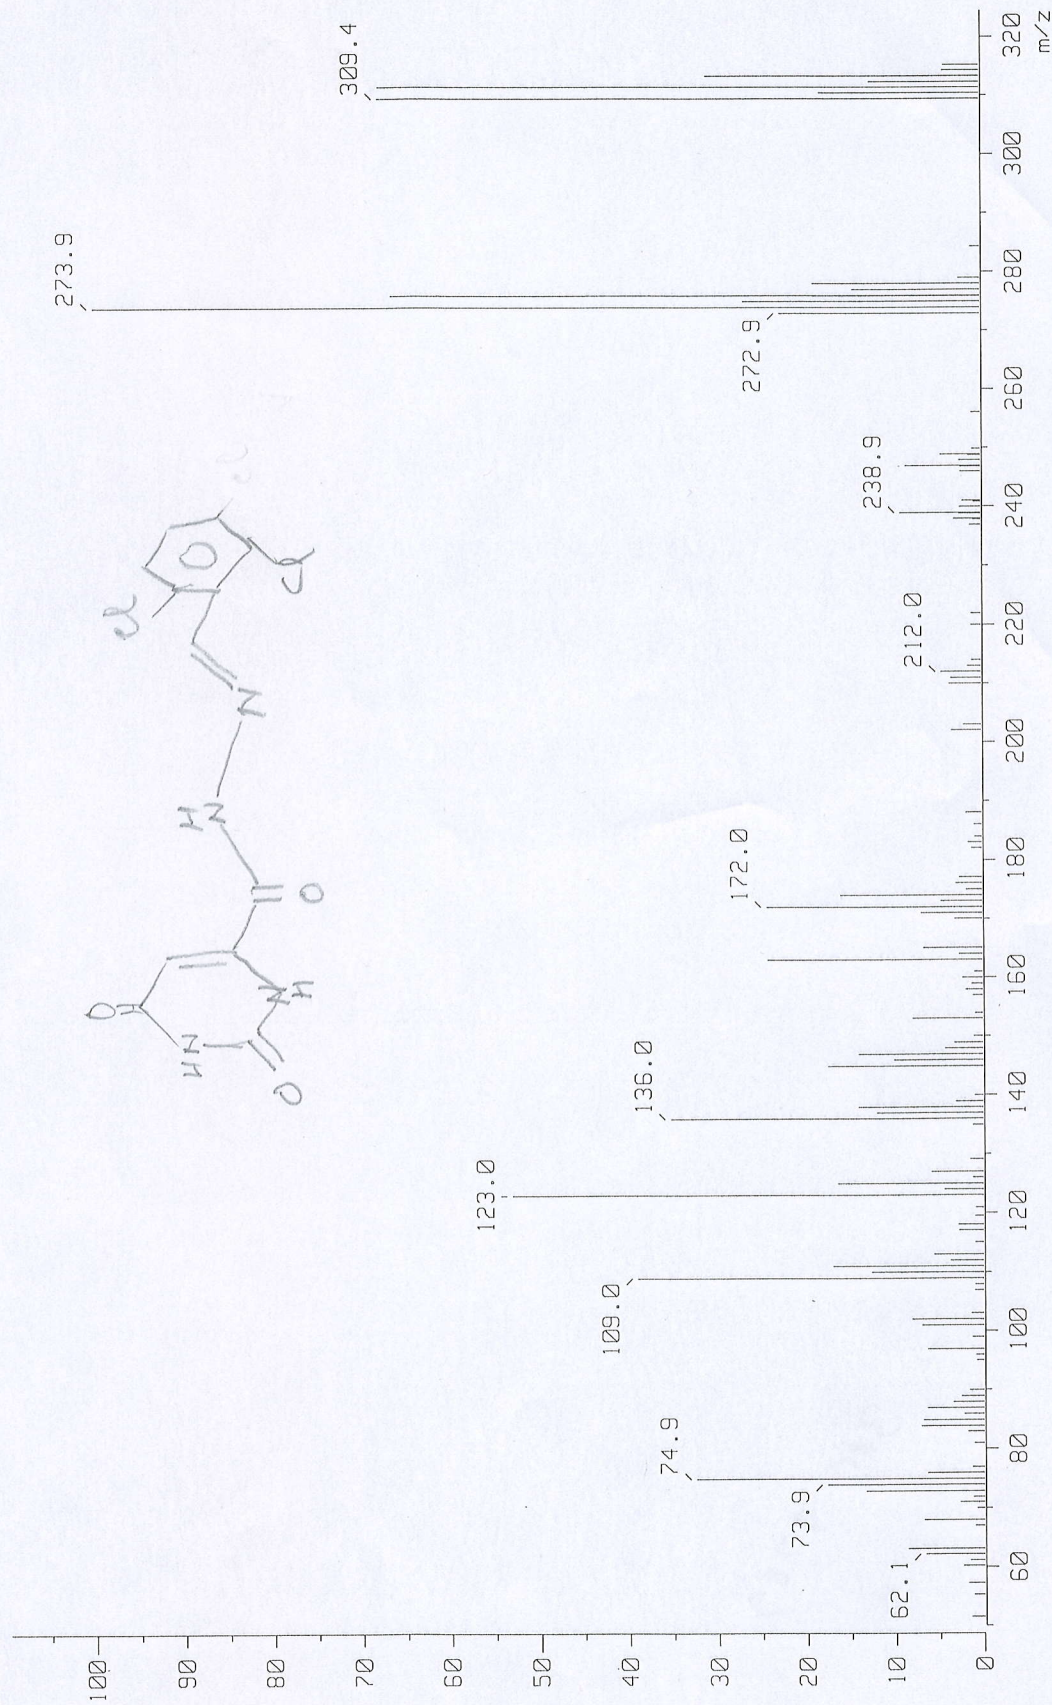



[ Mass Spectrum ]

Data : KSU-DI-EI-R5k-RB\_OEE003

Date : 06-May-2015 11:12

Sample : -

Note : -

Inlet : Direct

Ion Mode : EI+

Spectrum Type : Normal

Ion [MF-Linear]

RT : 1.74 min

Scan# : (12,45)

BP : m/z 67.9828

Int. : 400.00

Output m/z range : 50.0000 to 205.7864

Cut Level : 0.50 %

4718590

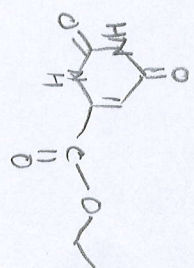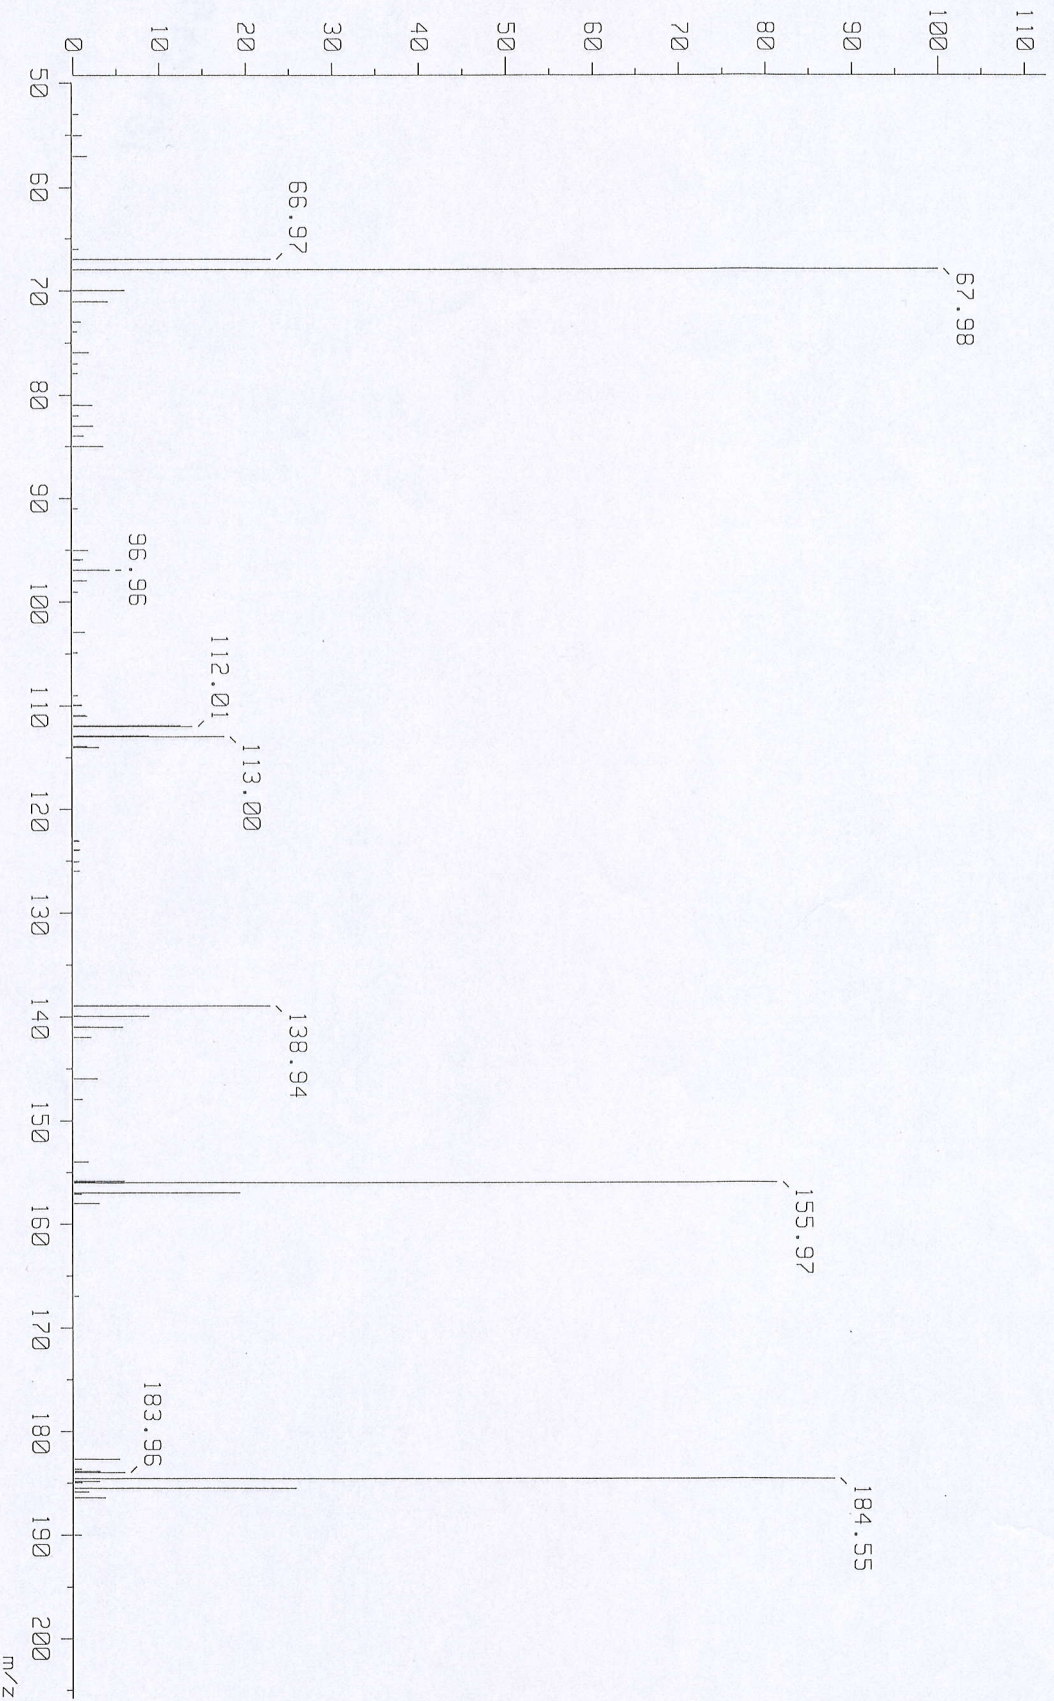



[ Mass Spectrum ]

Data : KSJ-DI-EI-R5k-ABOH-30R001

Date : 04-Feb-2014 08:44

Sample: -

Note : -

Inlet : Direct

Ion Mode : EI+

Spectrum Type : Normal Ion [MF-Linear]

RT : 3.55 min

Scan# : 79

BP : m/z 67.9831

Int. : 333.17

Output m/z range : 50.0000 to 307.0475

3815809

Cut Level : 0.30 %

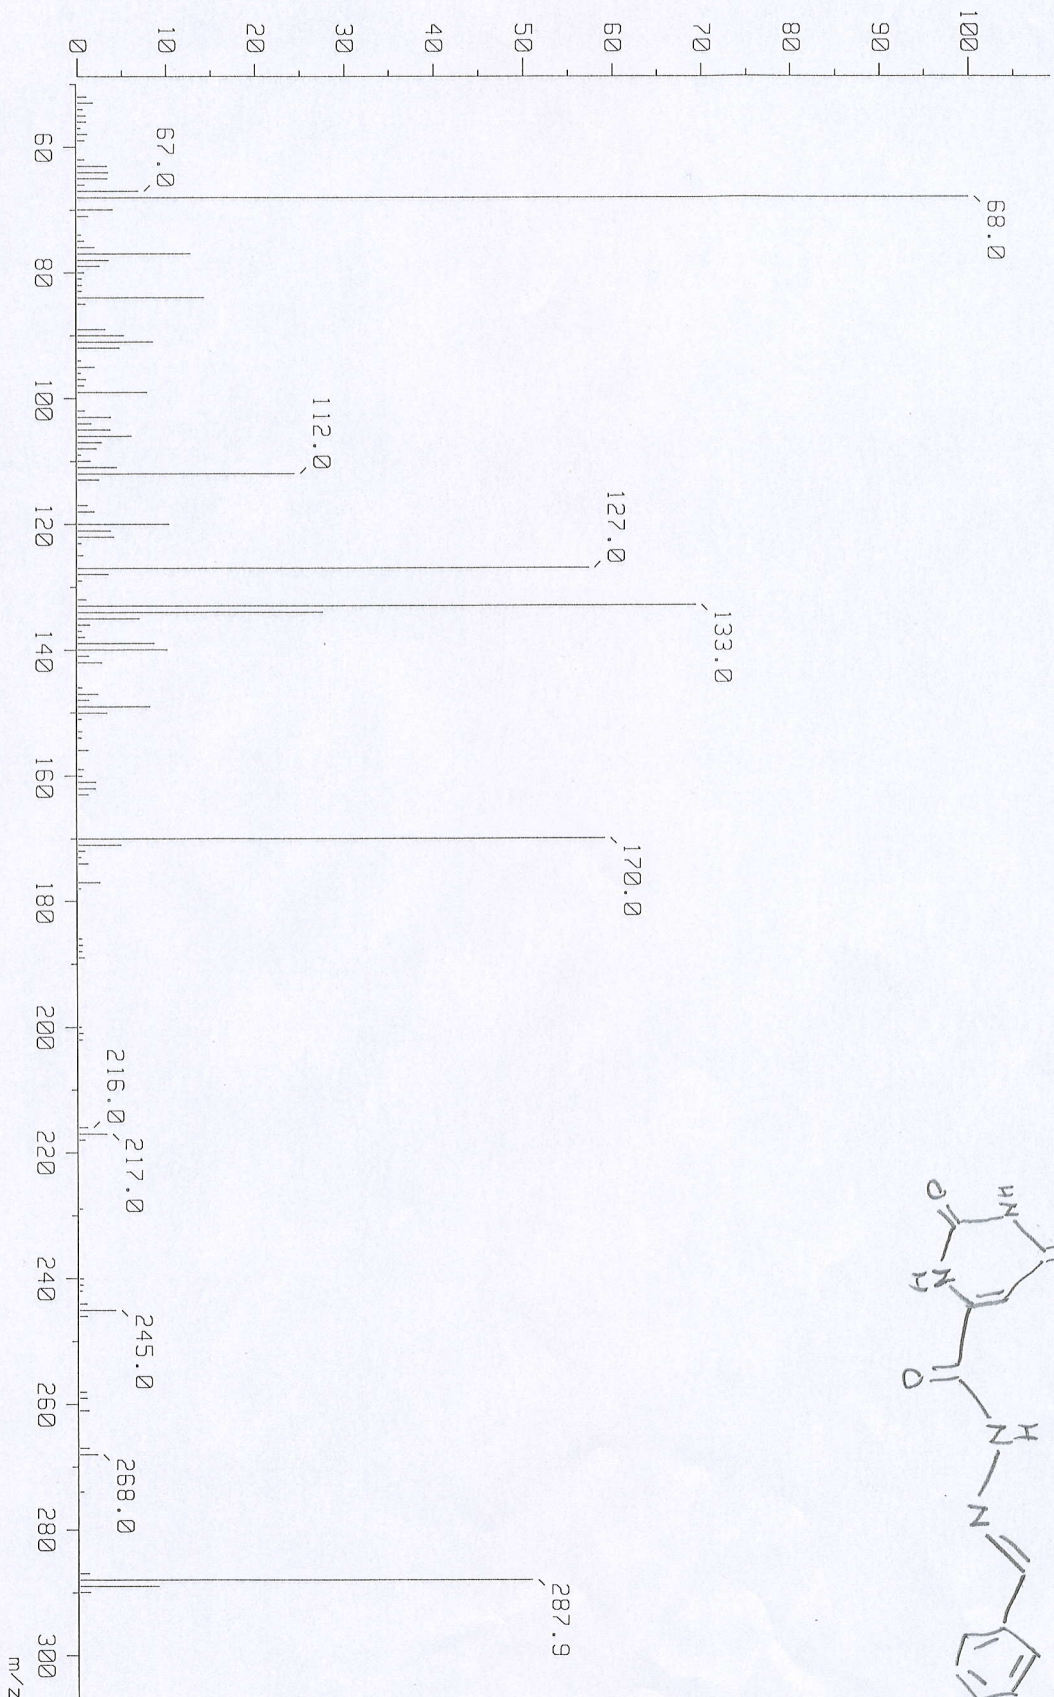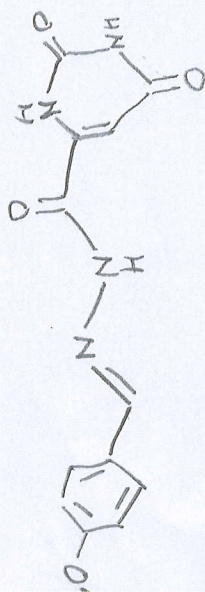



[ Mass Spectrum ]

Data : KSU-DI-EI-R5k-ABOH-29002

Date : 03-Feb-2014 11:17

Sample: -

Note : -

Inlet : Direct

Ion Mode : EI+

Spectrum Type : Normal Ion [MF-Linear]

RT : 0.82 min

Scan# : 19

BP : m/z 67.9832

Int. : 337.45

Output m/z range : 50.0000 to 271.6617

Cut Level : 0.50 %

4253610

120

110

100

90

80

70

60

50

40

30

20

10

0

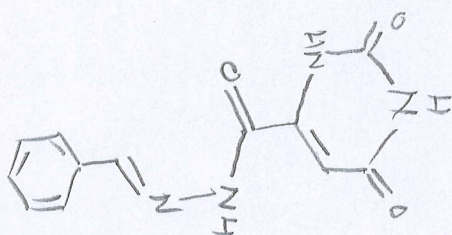

67.98

91.99

111.96

126.96

170.00

186.00

207.03

256.86

257.88

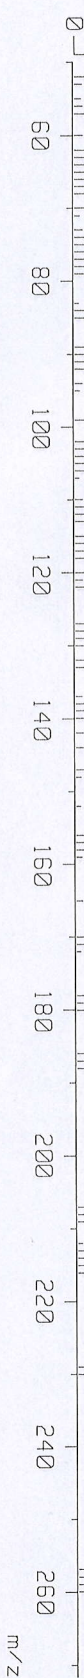



[ Mass Spectrum ]

Data : KSU-DI-EI-R5k-ABOH-33001

Date : 04-Feb-2014 07:56

Sample: -

Note: -

Inlet : Direct

Ion Mode : EI+

Spectrum Type : Normal Ion [MF-Linear]

RT : 0.96 min

Scan# : 22

BP : m/z 175.9615

Int. : 400.00

Output m/z range : 50.0000 to 311.7211

Cut Level : 0.30 %

5131330

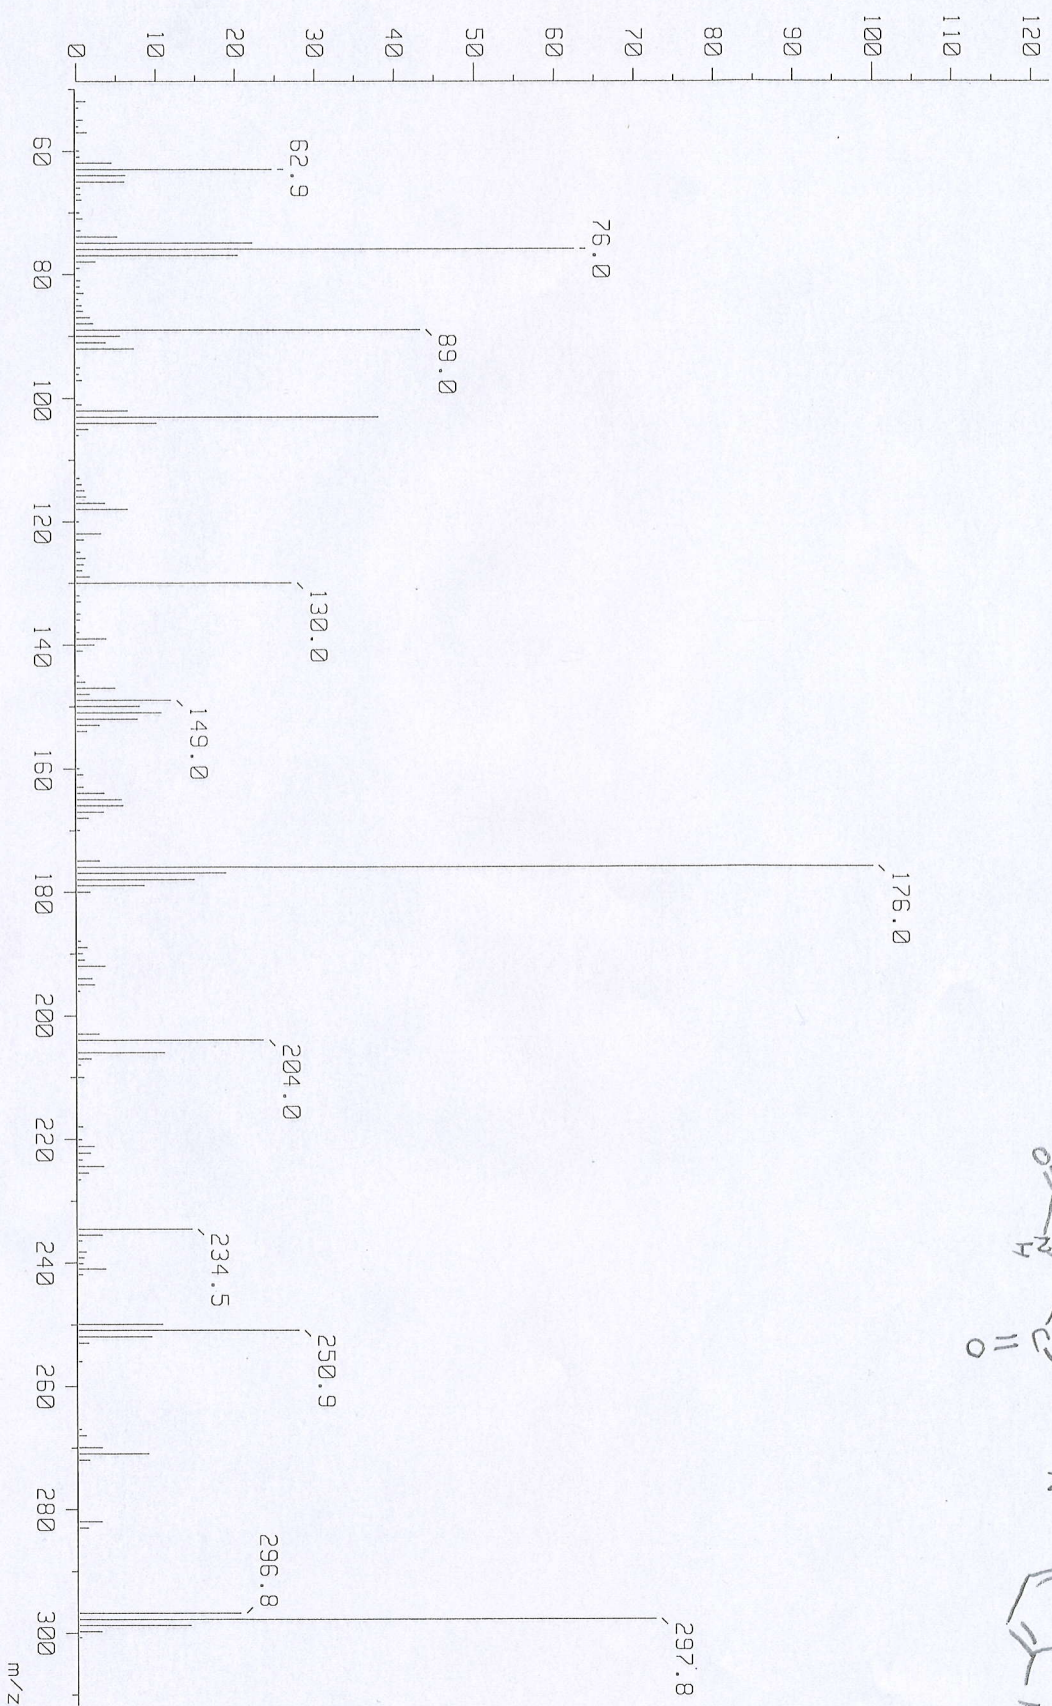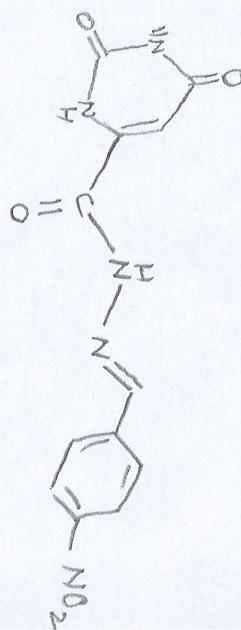



[ Mass Spectrum ]

Data : KSJ-DI-EI-R5k-AB0H-34001 Date : 05-Feb-2014 07:42

Sample: -

Note : -

Inlet : Direct

Ion Mode : EI+

Spectrum Type : Normal Ion [MF-Linear]

RT : 4.37 min Scan# : 97

BP : m/z 68.0102 Int. : 224.17

Output m/z range : 50.0000 to 347.1068 Cut Level : 0.60 %

2555969

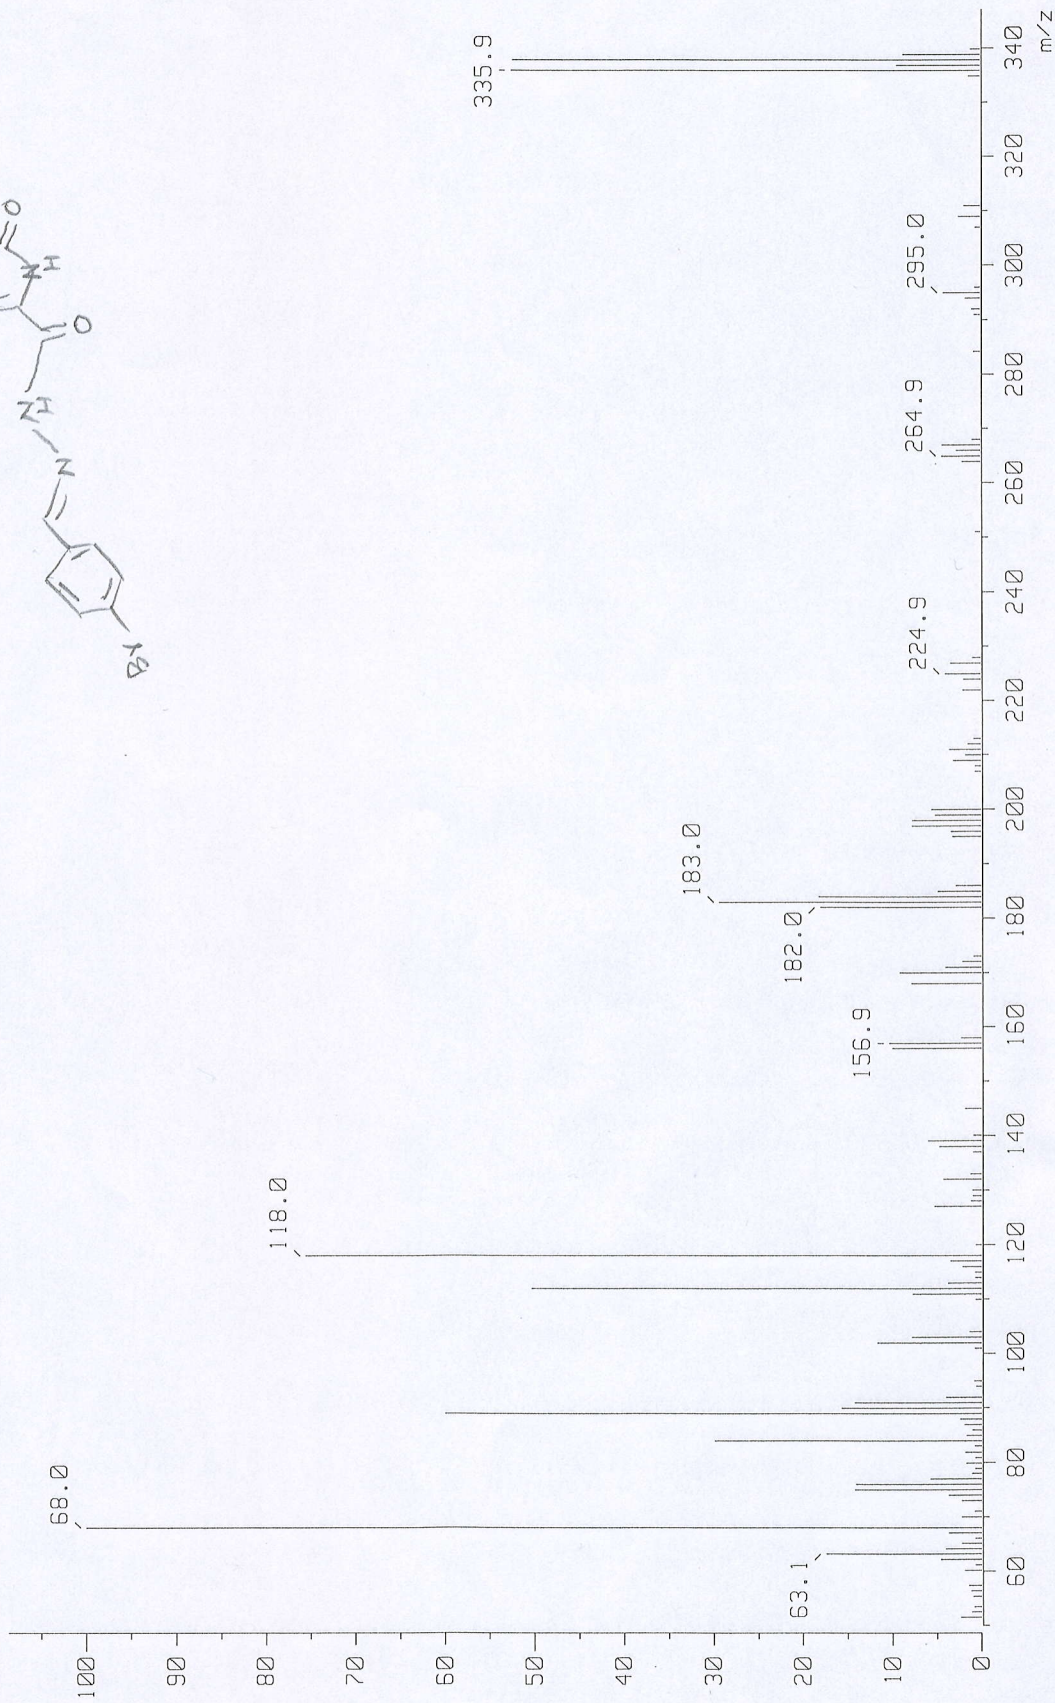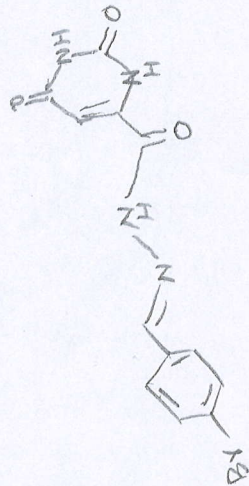

Supplement: Supplementary file 1 [file MS%20Data.PDF]
