# Supplementary material for: Evaluation of N-arylhydrazone derivatives of orotic acid as stimulators of human mesenchymal stem cell (hMSCs) differentiation.
Source: Preprints.org preprint supplement (doi:10.20944/preprints201807.0264.v1), 2018-07-16
Supplement: Supplementary file 2 [file NMR%20Data.PDF]

PROTON DMSO D: \\ abari 27

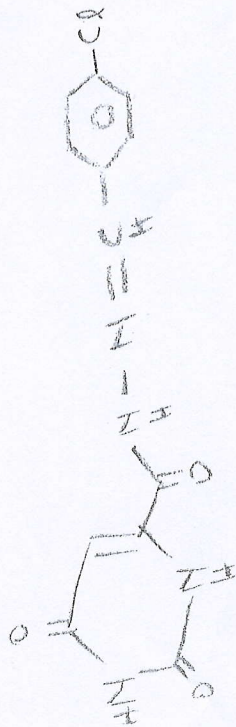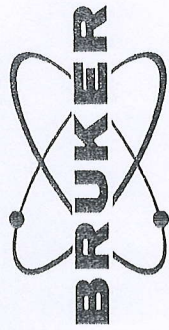

NAME dirbari-ABOH-39  
 EXPNO 10  
 PROCNO 1  
 Date\_ 20140313  
 Time\_ 12.57  
 INSTRUM spect  
 PROBHD 5 mm PABBO BB-  
 PULPROG zg30  
 TD 65536  
 SOLVENT DMSO  
 NS 16  
 DS 2  
 SWH 10330.578 Hz  
 FIDRES 0.157632 Hz  
 AQ 3.1720407 sec  
 RG 256  
 DW 48.400 usec  
 DE 6.50 usec  
 TE 298.3 K  
 D1 1.00000000 sec  
 TD0 1

===== CHANNEL f1 =====  
 NUC1 1H  
 P1 14.70 usec  
 PL1 -1.10 dB  
 SFO1 500.1330885 MHz  
 SI 32768  
 SF 500.1300000 MHz  
 EM 0  
 WDW 0  
 SSB 0.60 Hz  
 LB 0  
 GB 0  
 PC 1.00

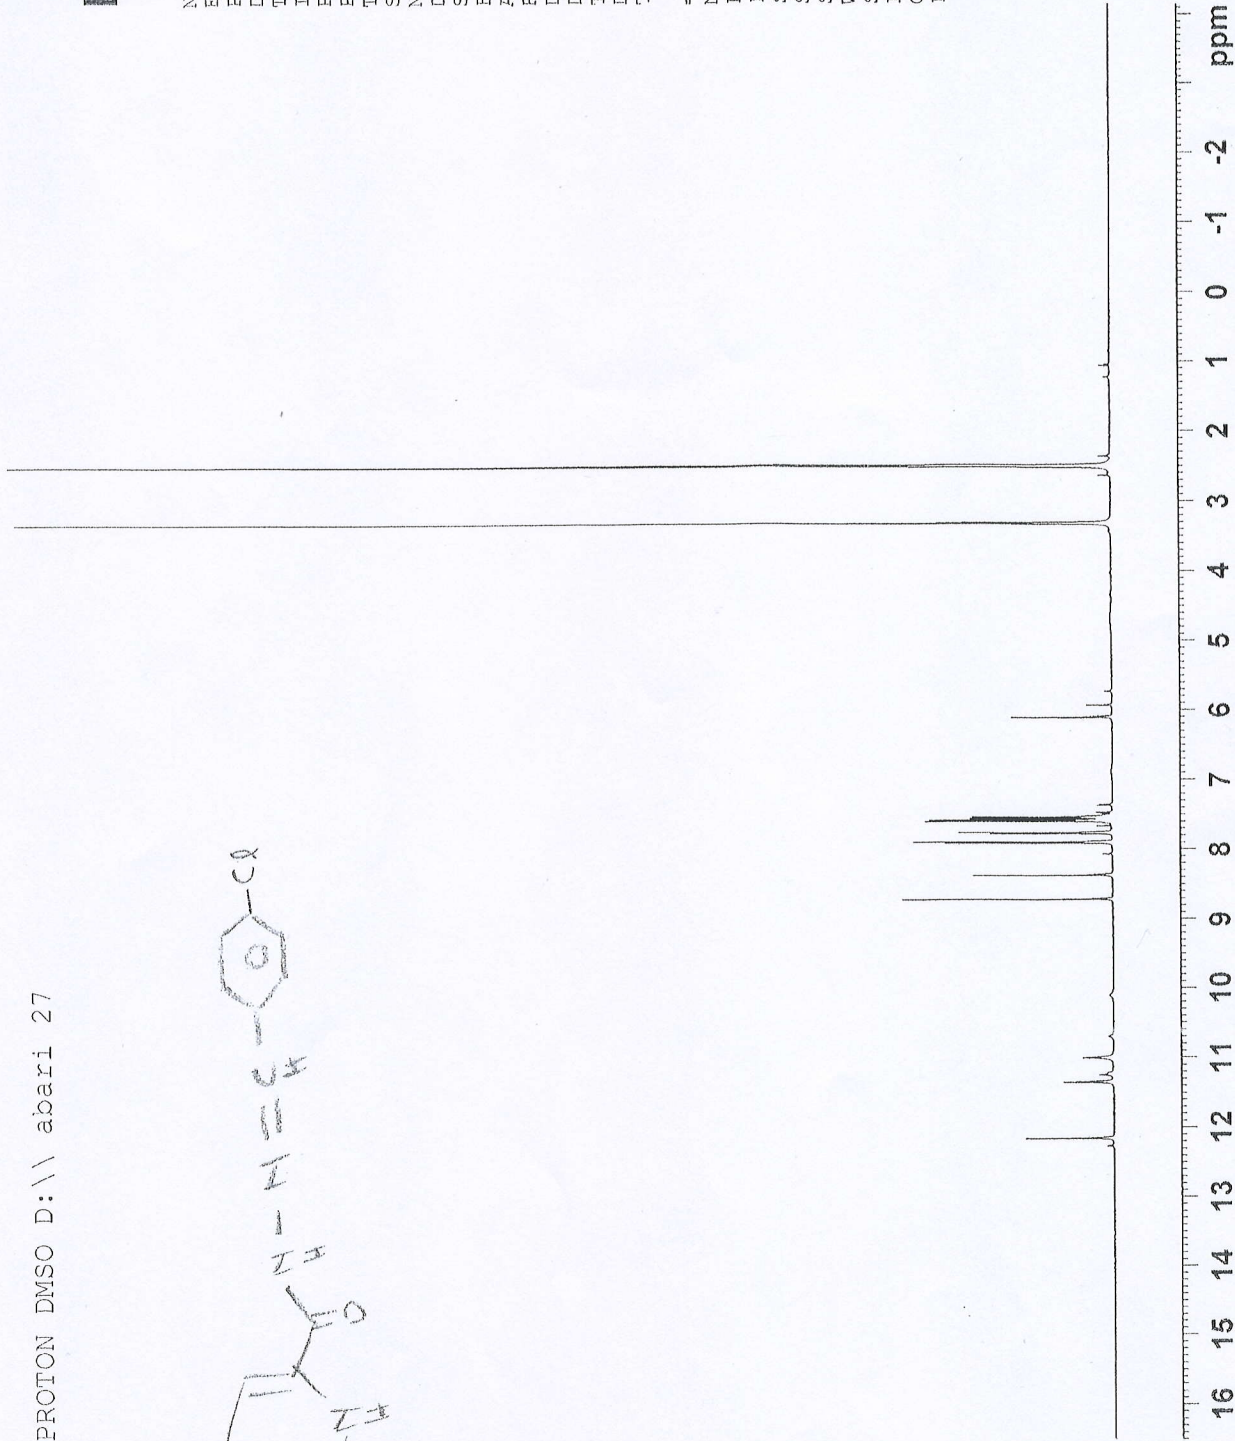

PROTON DMSO D:\ abari 46

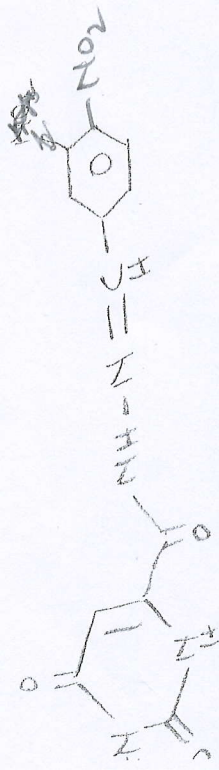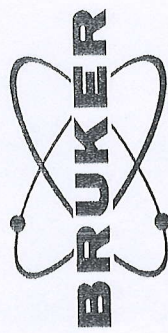

NAME drbari-ABOH-33  
 EXPNO 10  
 PROCNO 1  
 Date\_ 20140317  
 Time\_ 18.21  
 INSTRUM spect  
 PROBHD 5 mm PABBO BB-  
 PULPROG zg30  
 TD 65536  
 SOLVENT DMSO  
 NS 16  
 DS 2  
 SWH 10330.578 Hz  
 FIDRES 0.157632 Hz  
 AQ 3.1720407 sec  
 RG 362  
 DW 48.400 usec  
 DE 6.50 usec  
 TE 297.3 K  
 D1 1.00000000 sec  
 TD0 1

===== CHANNEL f1 =====  
 NUC1 1H  
 P1 14.70 usec  
 PL1 -1.10 dB  
 SFO1 500.1330885 MHz  
 SI 32768  
 SF 500.1300000 MHz  
 EM  
 WDW 0  
 SSB 0.30 Hz  
 LB 0  
 GB 0  
 PC 1.00

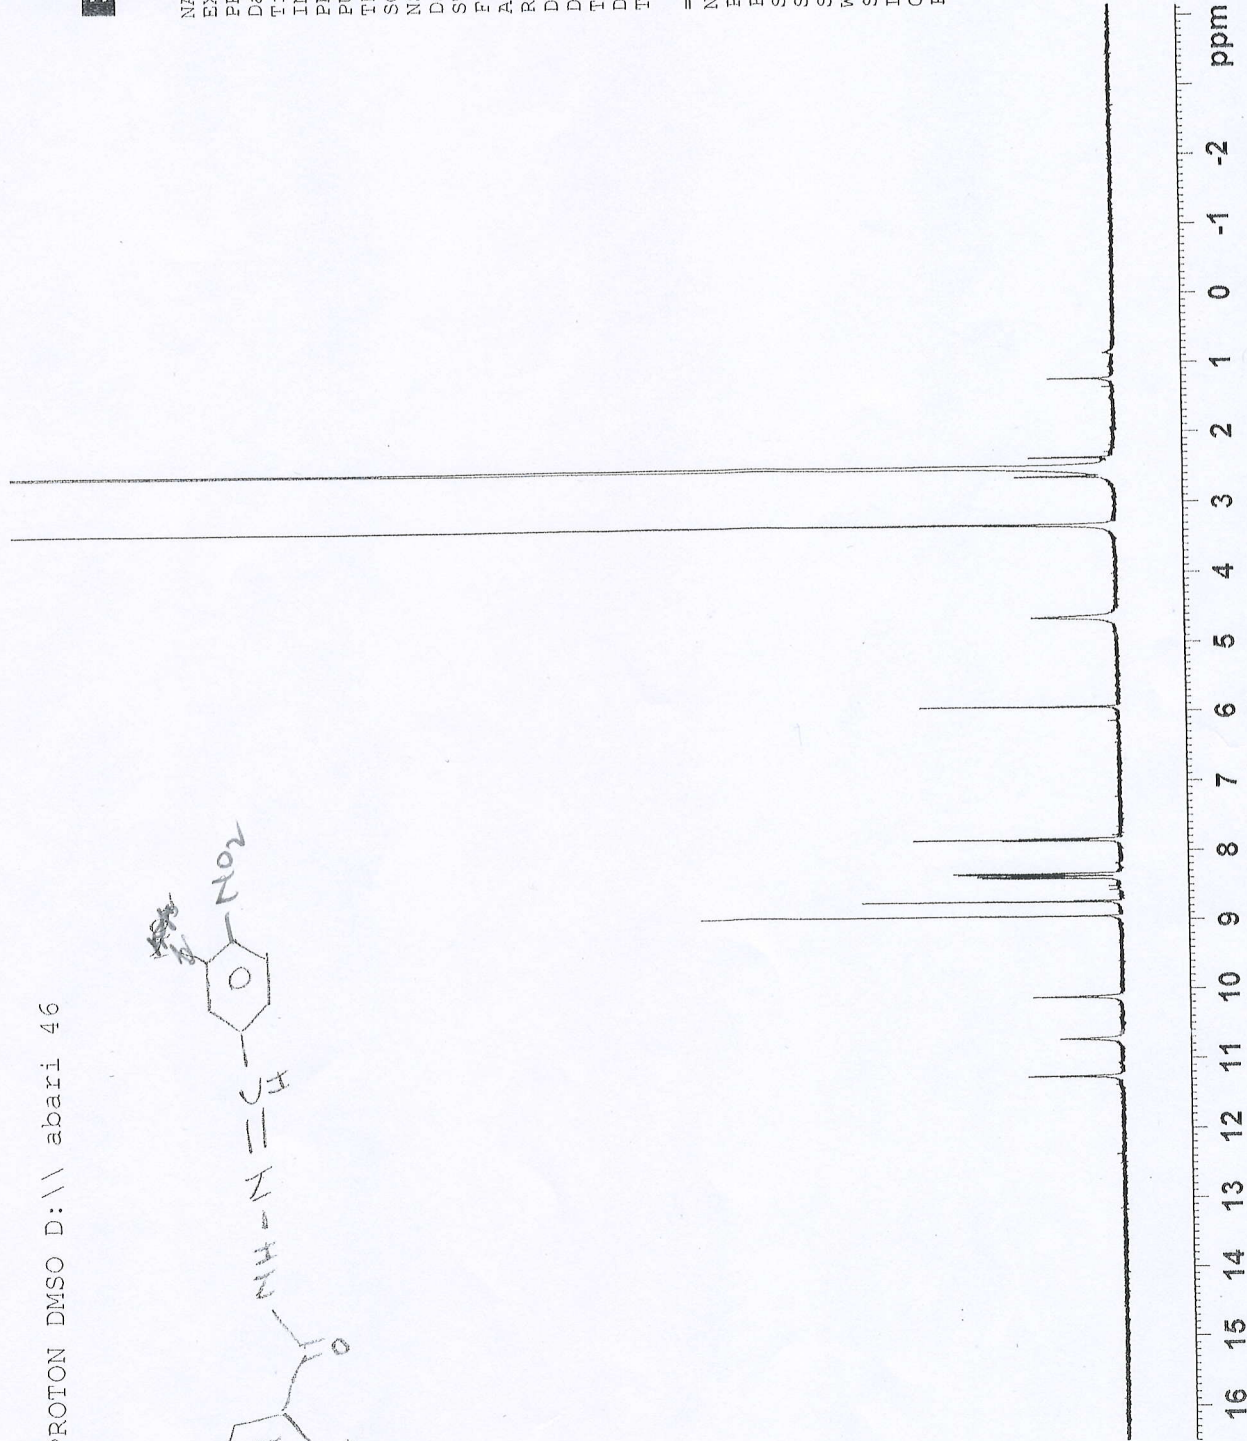



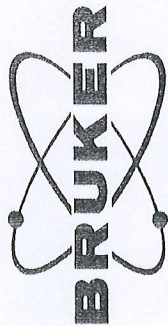

NAME drbari-OroticEthEster  
 EXPNO 10  
 PROCNO 1  
 Date\_ 20160601  
 Time\_ 12.45  
 INSTRU spect  
 PROBHD 5 mm PABBO BB-  
 PULPROG zg30  
 TD 65536  
 SOLVENT DMSO  
 NS 16  
 DS 2  
 SWH 10330.578 Hz  
 FIDRES 0.157632 Hz  
 AQ 3.1720407 sec  
 RG 322.5  
 DW 48.400 usec  
 DE 6.50 usec  
 TE 298.2 K  
 D1 1.00000000 sec  
 TD0 1

===== CHANNEL f1 =====  
 NUC1 1H  
 P1 14.70 usec  
 PL1 -1.10 dB  
 SFO1 500.1330885 MHz  
 SI 32768  
 SF 500.1300000 MHz  
 WDW EM  
 SSB 0  
 LB 0.30 Hz  
 GB 0  
 PC 1.00

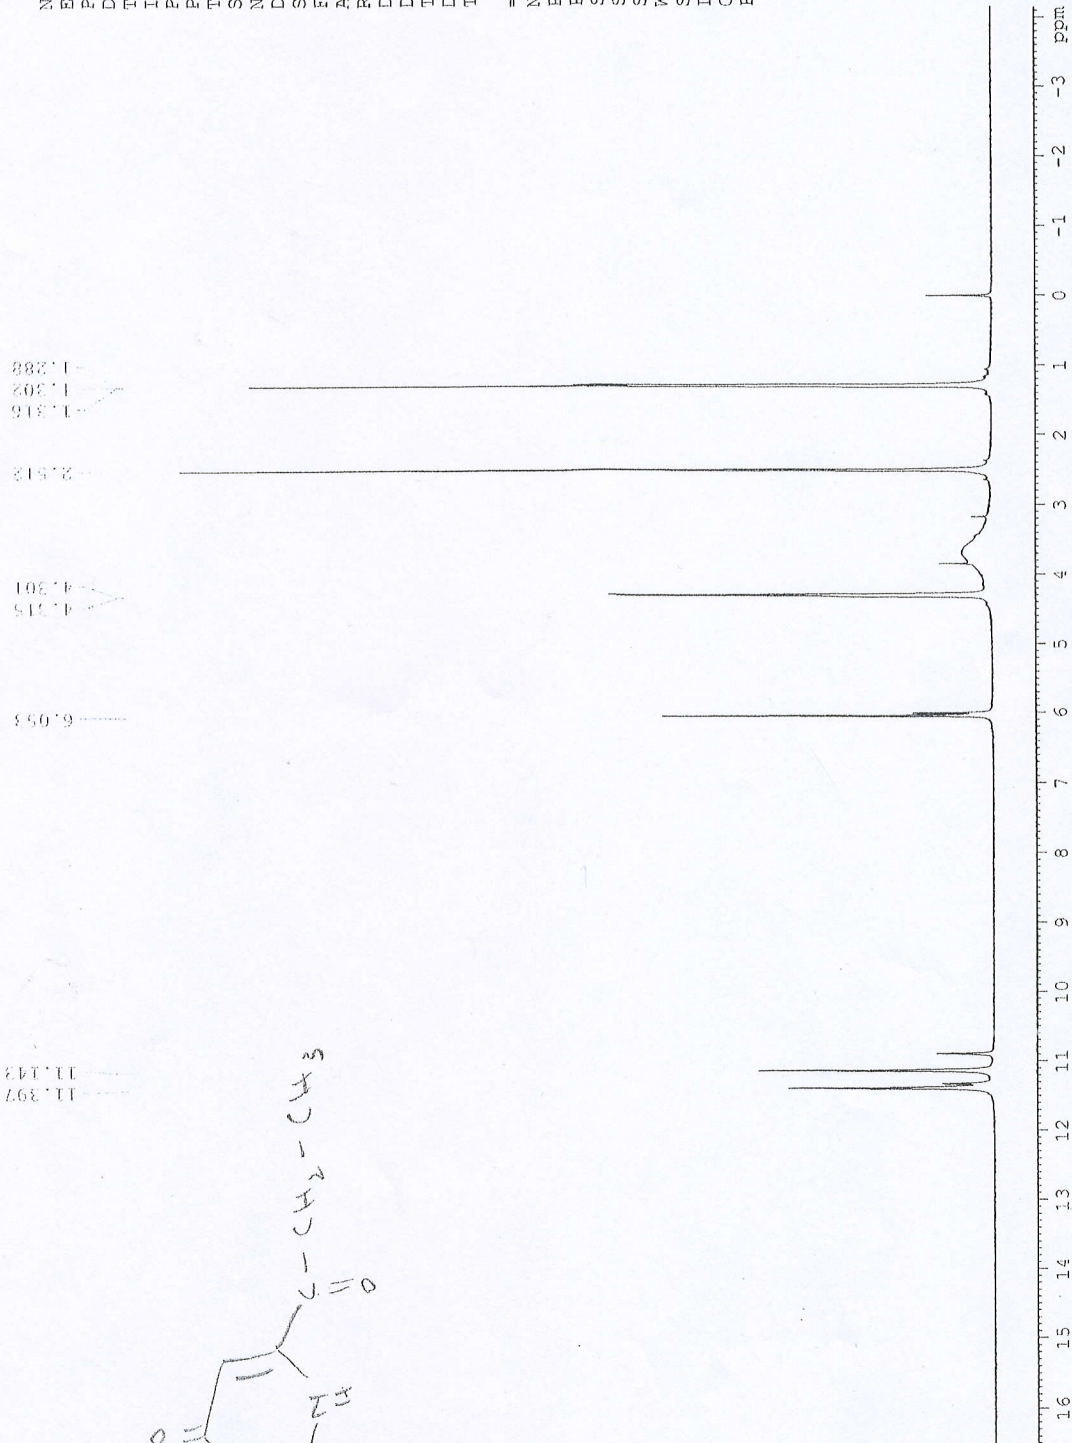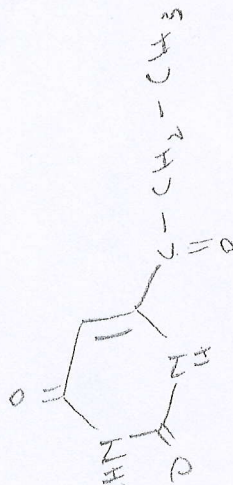

PROTON DMSO D:// abari 47

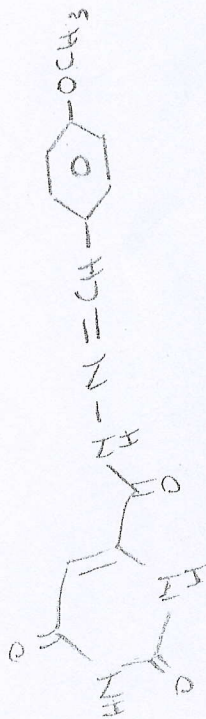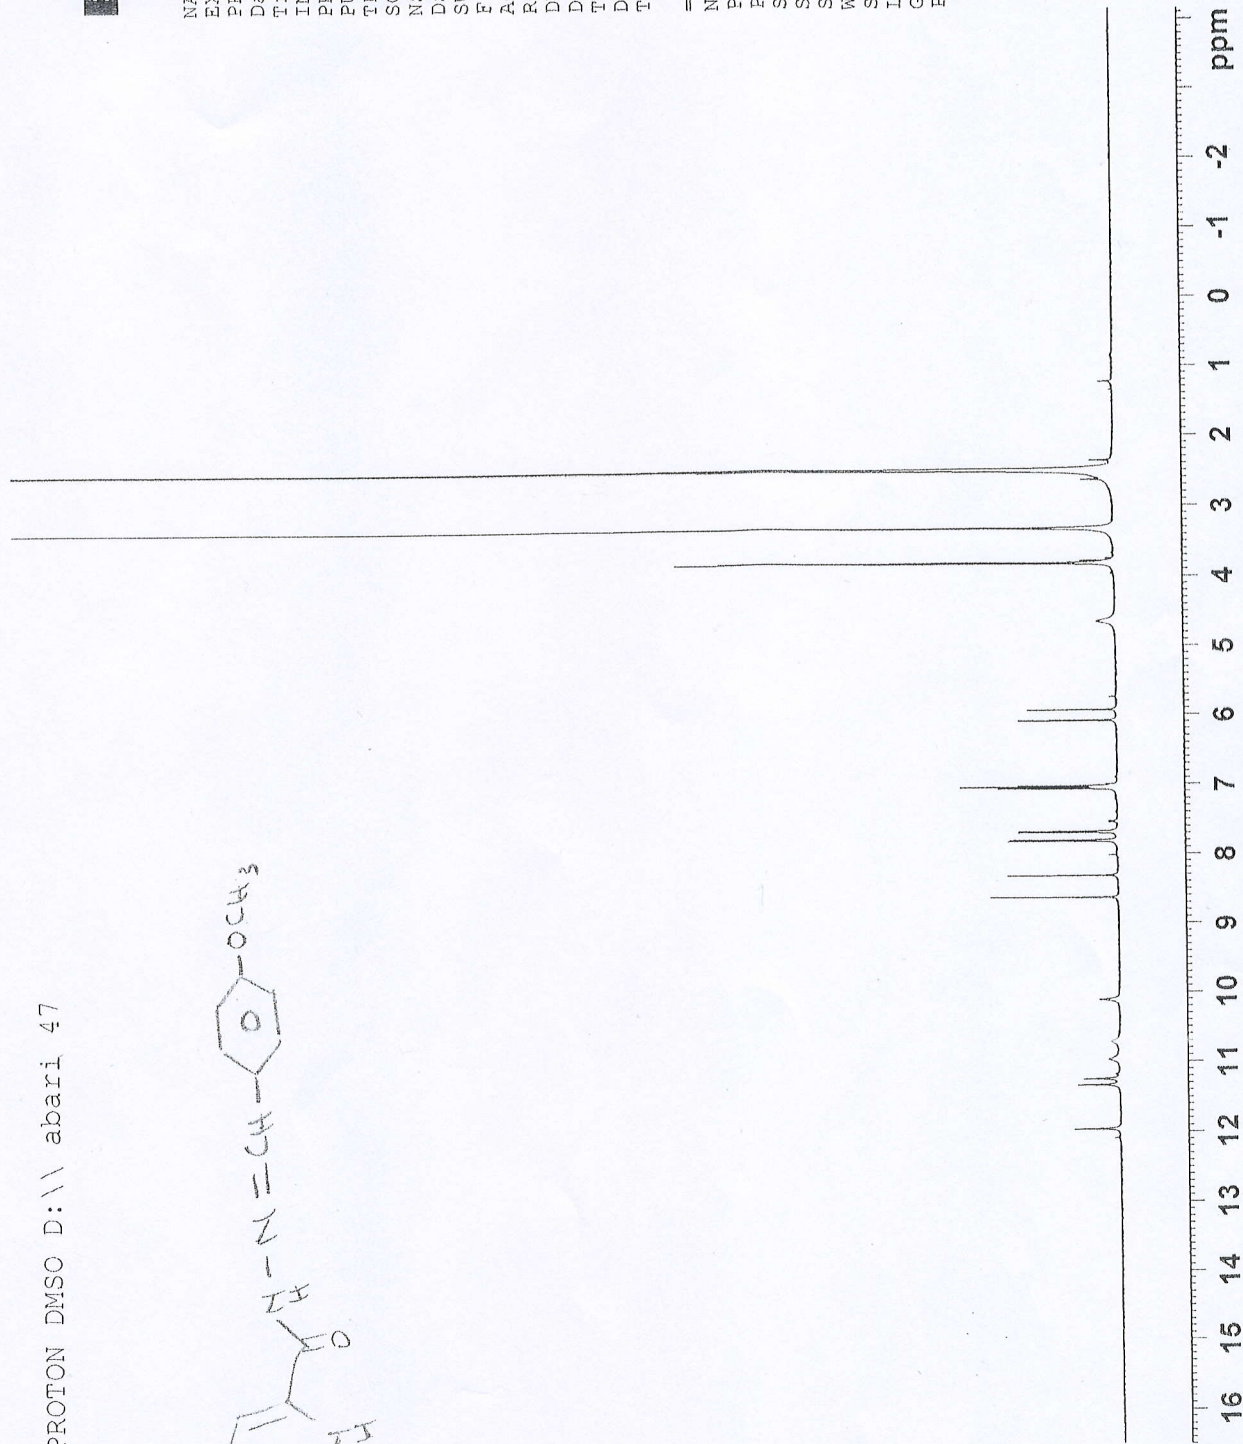

|         |                 |
|---------|-----------------|
| NAME    | dirbari-ABOH-30 |
| EXPNO   | 10              |
| PROCNO  | 1               |
| Date_   | 20140317        |
| Time_   | 21:19           |
| INSTRUM | spect           |
| PROBHD  | 5 mm PABBO BB-  |
| PULPROG | zg30            |
| TD      | 65536           |
| SOLVENT | DMSO            |
| NS      | 16              |
| DS      | 2               |
| SWH     | 10330.578 Hz    |
| FIDRES  | 0.157632 Hz     |
| AQ      | 3.1720407 sec   |
| RG      | 362             |
| DW      | 48.400 usec     |
| DE      | 6.50 usec       |
| TE      | 297.2 K         |
| DL      | 1.00000000 sec  |
| TD0     | 1               |

```

===== CHANNEL f1 =====
NUC1      1H
P1         14.70 usec
P1L        -1.10 dB
SF01       500.1330885 MHz
SI         32768
SF         500.1300000 MHz
EM
SSB        0
LB         0.30 Hz
GB         0
PC         1.00

```

16 15 14 13 12 11 10 9 8 7 6 5 4 3 2 1 0 -1 -2 ppm
